# Supplementary material for: Rapid Patient-Side Evaluation of Endothelial Glycocalyx Thickness in Healthy Sedated Cats Using GlycoCheck® Software
Source: Front Vet Sci. 2022 Jan 3;8:727063. doi: 10.3389/fvets.2021.727063 (PMC8761653; doi:10.3389/fvets.2021.727063)
Supplement: Supplementary file 2 [file Table_2.xlsx]

## Sheet: Sheet1
	Patient Name	DOB	Sex	Weight (kg)	Breed	Date of Report	ASA	HR	Temp	SpO2	etCO2	RR	Spont/Mech	BP	Method	Maint	Recordings	Sites	Density	RBC Filling (%)	PBR 5-25	PBR 5-9	PBR 10-19	PBR 20-25	Median P50	Dperf (P50 + PBR)
1	Palmer, Patches	2006-12-19	FS	3.7	DSH	2017-03-19	1	56	99.5	100	37	9	Spont	114/70 (78)	Oscill	Iso	23	2680/3119	280/326	83.4	1.6	0.89	1.64	2.13	9.02	10.62
																	24	2475/3078	269/335	71.2	1.72	1.06	1.97	1.86	8.85	10.57
																	44	2053/2989	110/160	77.1	2.21	1.16	2.37	2.8	9.74	11.95
2	Fetters, Dash	2012-04-20	MC	4.02	DSH	2017-04-25	1	97	97.8	100	29	11	Spont	100	Sphyg	Iso	85	419/717	12/20	62.3	2.32	1.13	2.41	3.55	9.73	12.05
3	Jacobs, Lola	2016-01-12	FS	3.2	DSH	2017-03-27	1	100	99.1	100	35	8	Spont	N/A	N/A	Sevo	6	193/241	78/97	65.1	2.53	1.38	3.18	-	8.63	11.16
